# Supplementary material for: Different irradiances of UV and PAR in the same ratios alter the flavonoid profiles of Arabidopsis thaliana wild types and UV-signalling pathway mutants
Source: Royal Society of Chemistry journal article supplement (doi:10.1039/c8pp00496j), 2019-05-23
Supplement: c8pp00496j1.pdf [file c8pp00496j1.pdf]

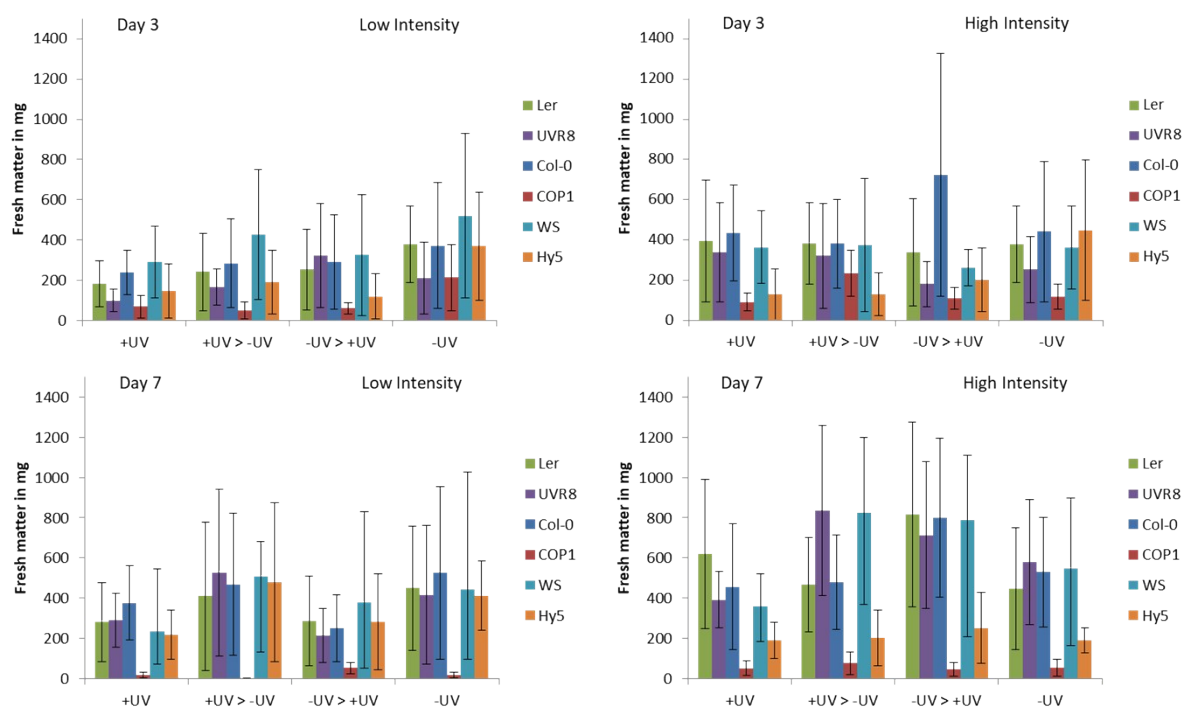

S1 Fresh matter of *Arabidopsis thaliana* wildtypes and UV-signalling mutants at day 3 and day 7 after a transfer to/from a +UV and -UV condition in low or high UV+PAR intensities (n= 3)
